# Supplementary material for: Serbian Traditional Goat Cheese: Physico-Chemical, Sensory, Hygienic and Safety Characteristics
Source: Microorganisms. 2021 Dec 31;10(1):90. doi: 10.3390/microorganisms10010090 (PMC8778733; doi:10.3390/microorganisms10010090)
Supplement: Supplementary file 1 [file microorganisms-10-00090-s001.zip › microorganisms-1526484-supplementary.pdf]

## Supplementary material

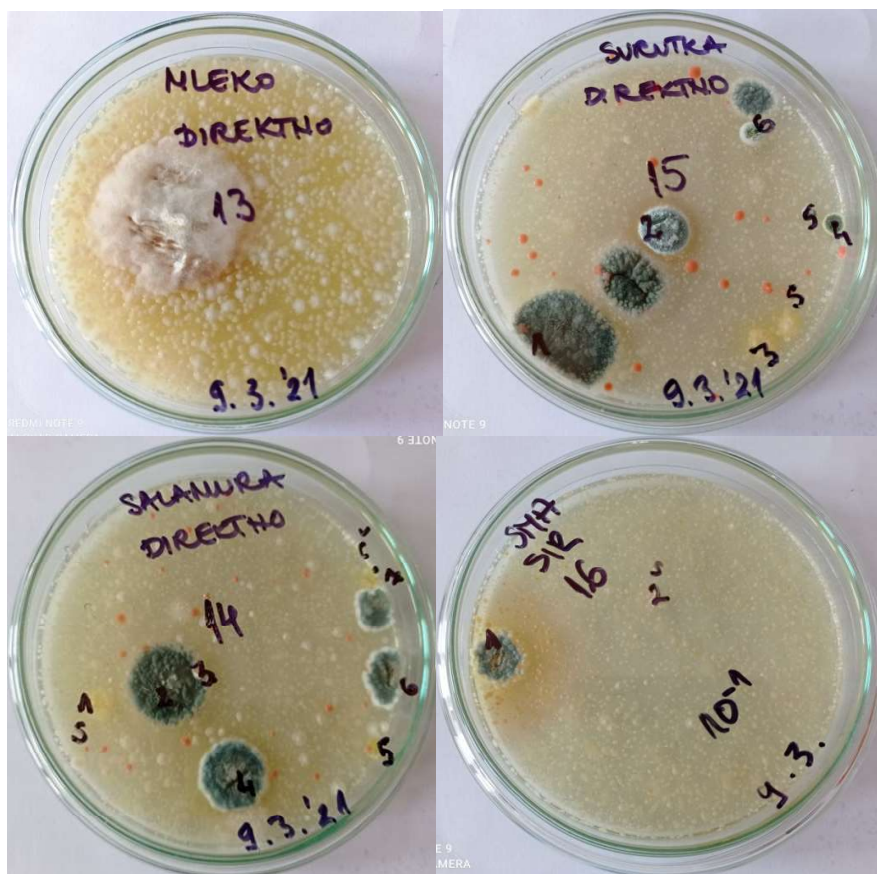

**Supplementary Figure S1.** Plates inoculated with: A (goat milk); B (whey); C (brine); D (goat cheese) after incubation

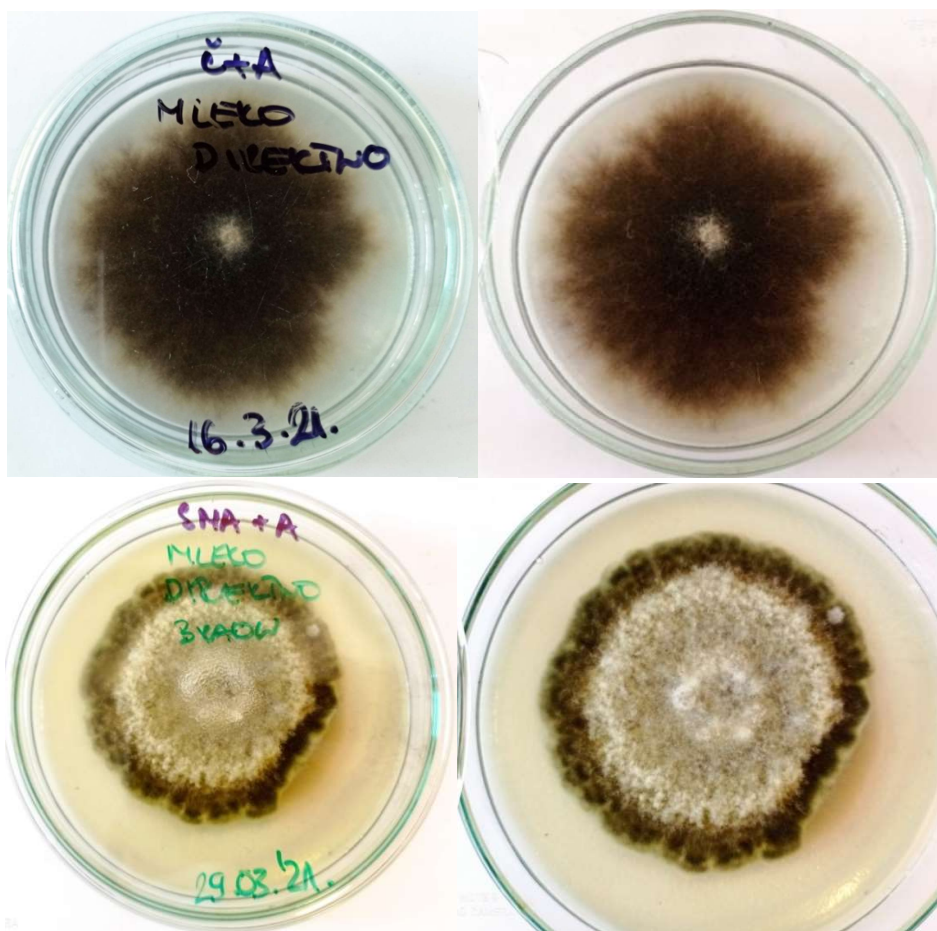

Supplementary Figure S2. *Alternaria alternata* isolated from goat milk

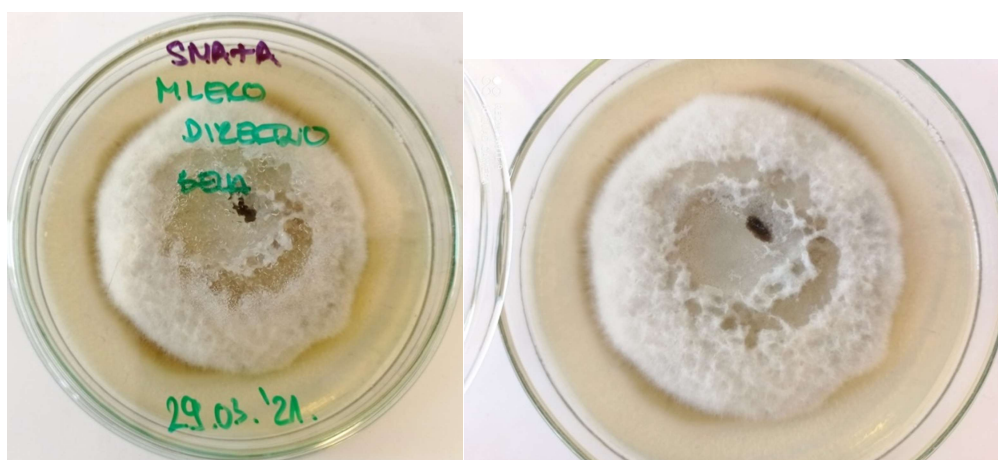

Supplementary Figure S3. *Geotrichum candidum* isolated from goat milk

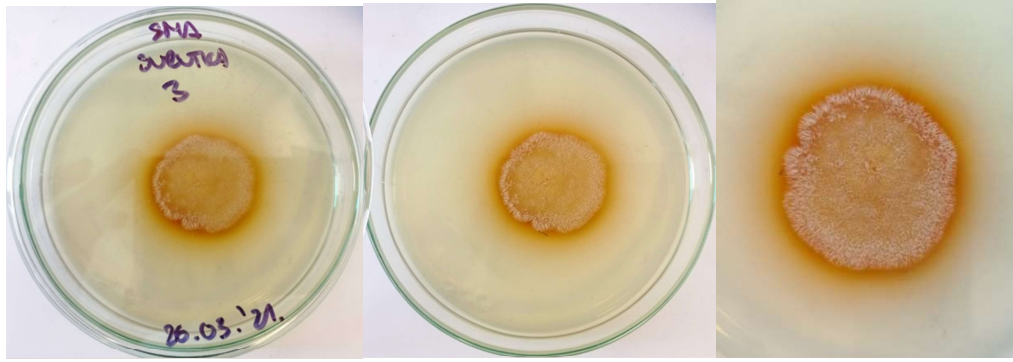

Supplementary Figure S4. *Acremonium strictum* isolated from whey

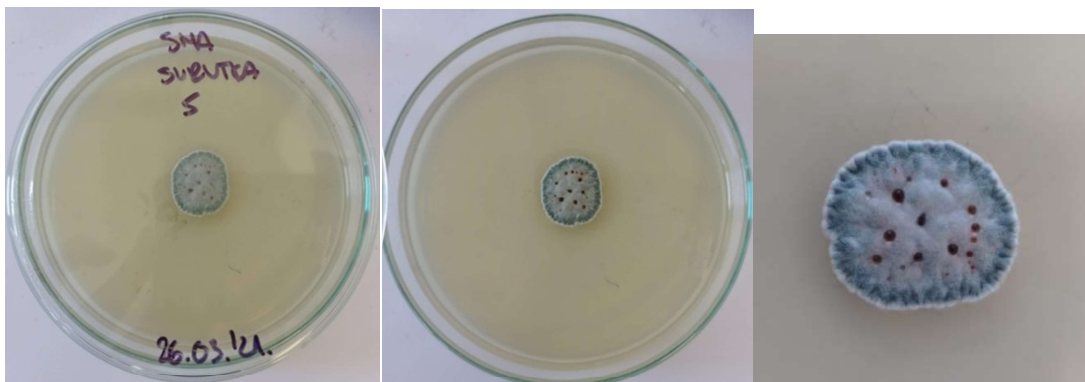

Supplementary Figure S5. *Penicillium brevicompactum* isolated from whey

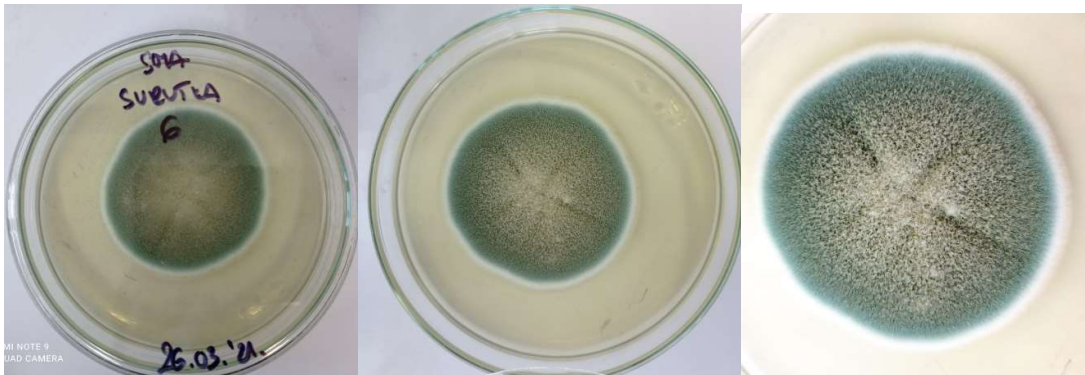

Supplementary Figure S6. *Penicillium chrysogenum* isolated from whey

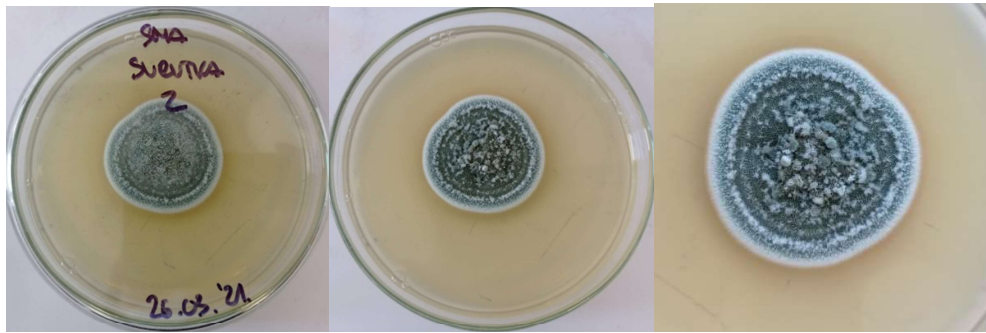

Supplementary Figure S7. *Penicillium expansum* isolated from whey

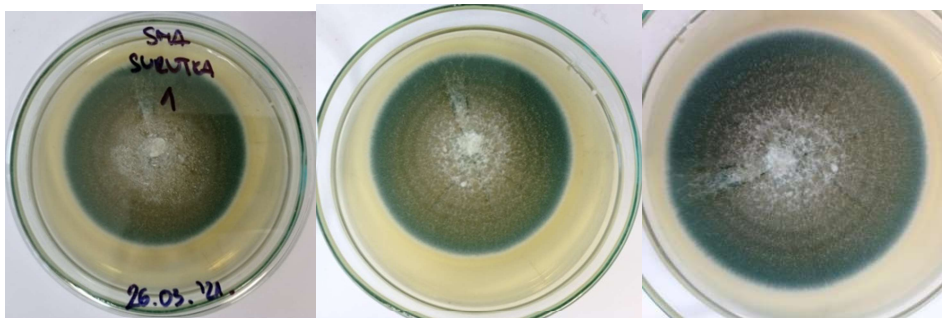

Supplementary Figure S8. *Penicillium glabrum* isolated from whey

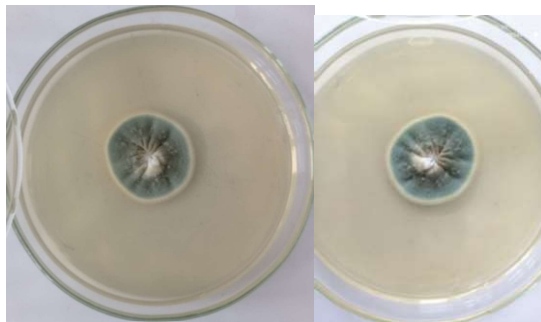

Supplementary Figure S9. *Talaromyces albobiverticillus* isolated from whey

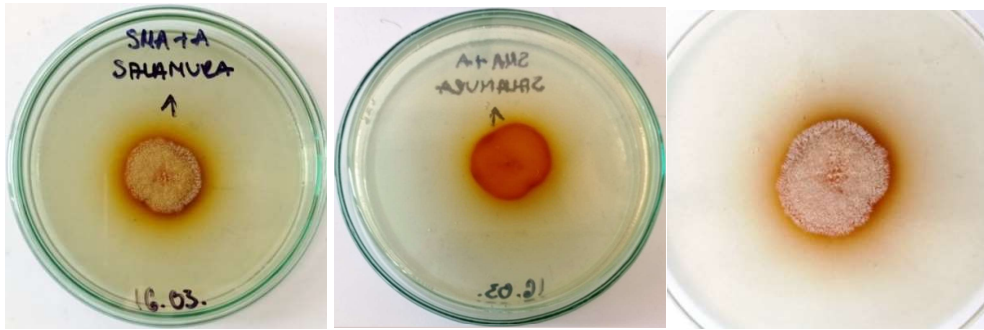

Supplementary Figure S10. *Acromonium strictum* isolated from brine

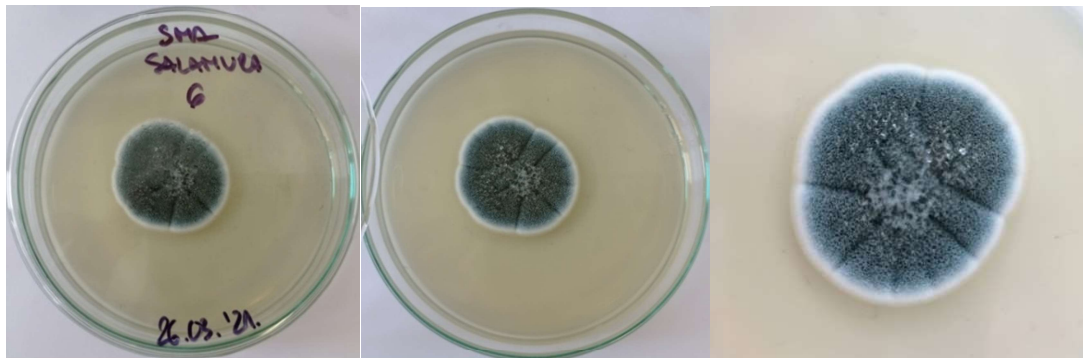

Supplementary Figure S11. *Penicillium aurantiogriseum* isolated from brine

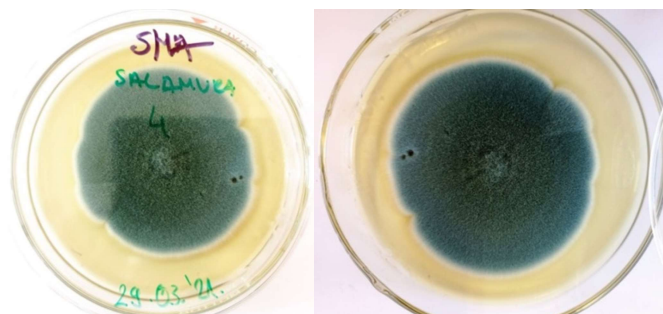

Supplementary Figure S12. *Penicillium glabrum* isolated from brine

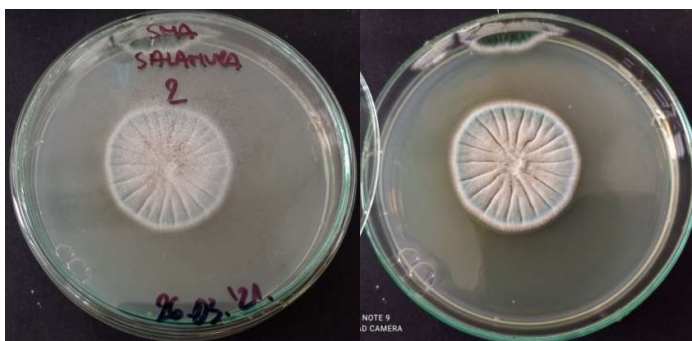

Supplementary Figure S13. *Penicillium thomii* isolated from brine

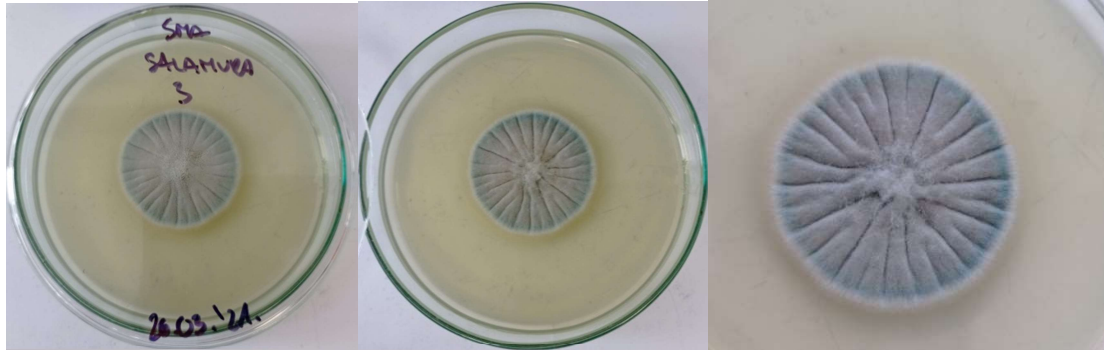

**Supplementary Figure S14.** *Penicillium thomii* isolated from brine

Goat cheese

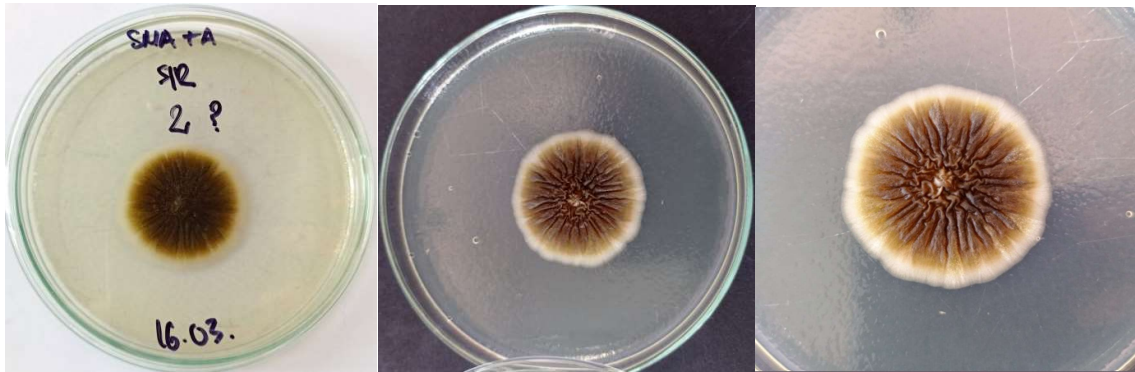

Supplementary Figure S15. *Cladosporium macrocarpum* isolated from goat cheese (0 day)

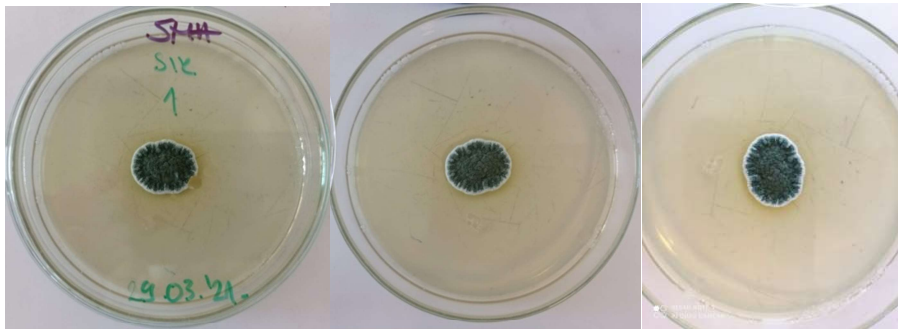

Supplementary Figure S16. *Penicillium aurantiogriseum* isolated from goat cheese (0 day)

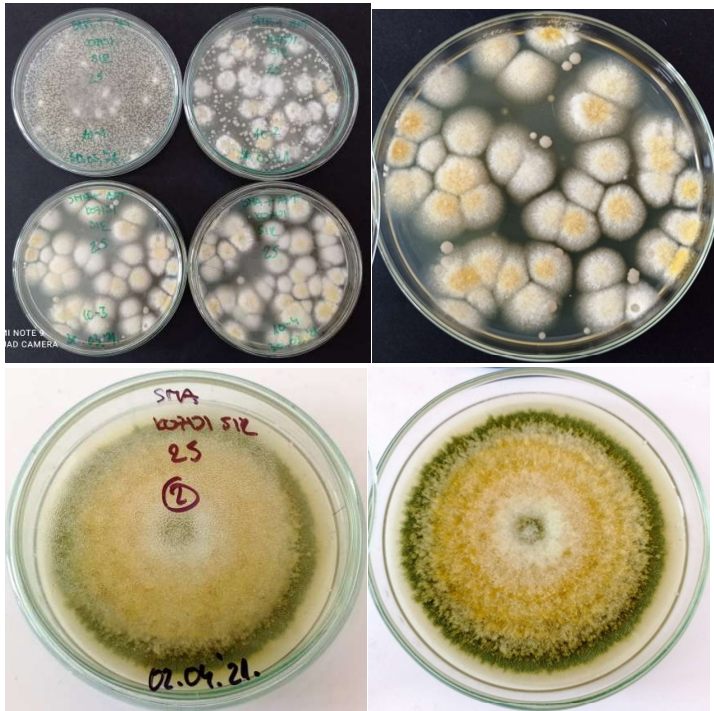

Supplementary Figure S17. *Aspergillus flavus* isolated from goat cheese (21<sup>st</sup> day)
